# Supplementary material for: Gardening in Childcare Centers: A Randomized Controlled Trial Examining the Effects of a Garden Intervention on Physical Activity among Children Aged 3–5 Years in North Carolina
Source: MDPI journal article supplement (doi:10.3390/ijerph20115939), 2023-05-24
Supplement: s1 [file s1]

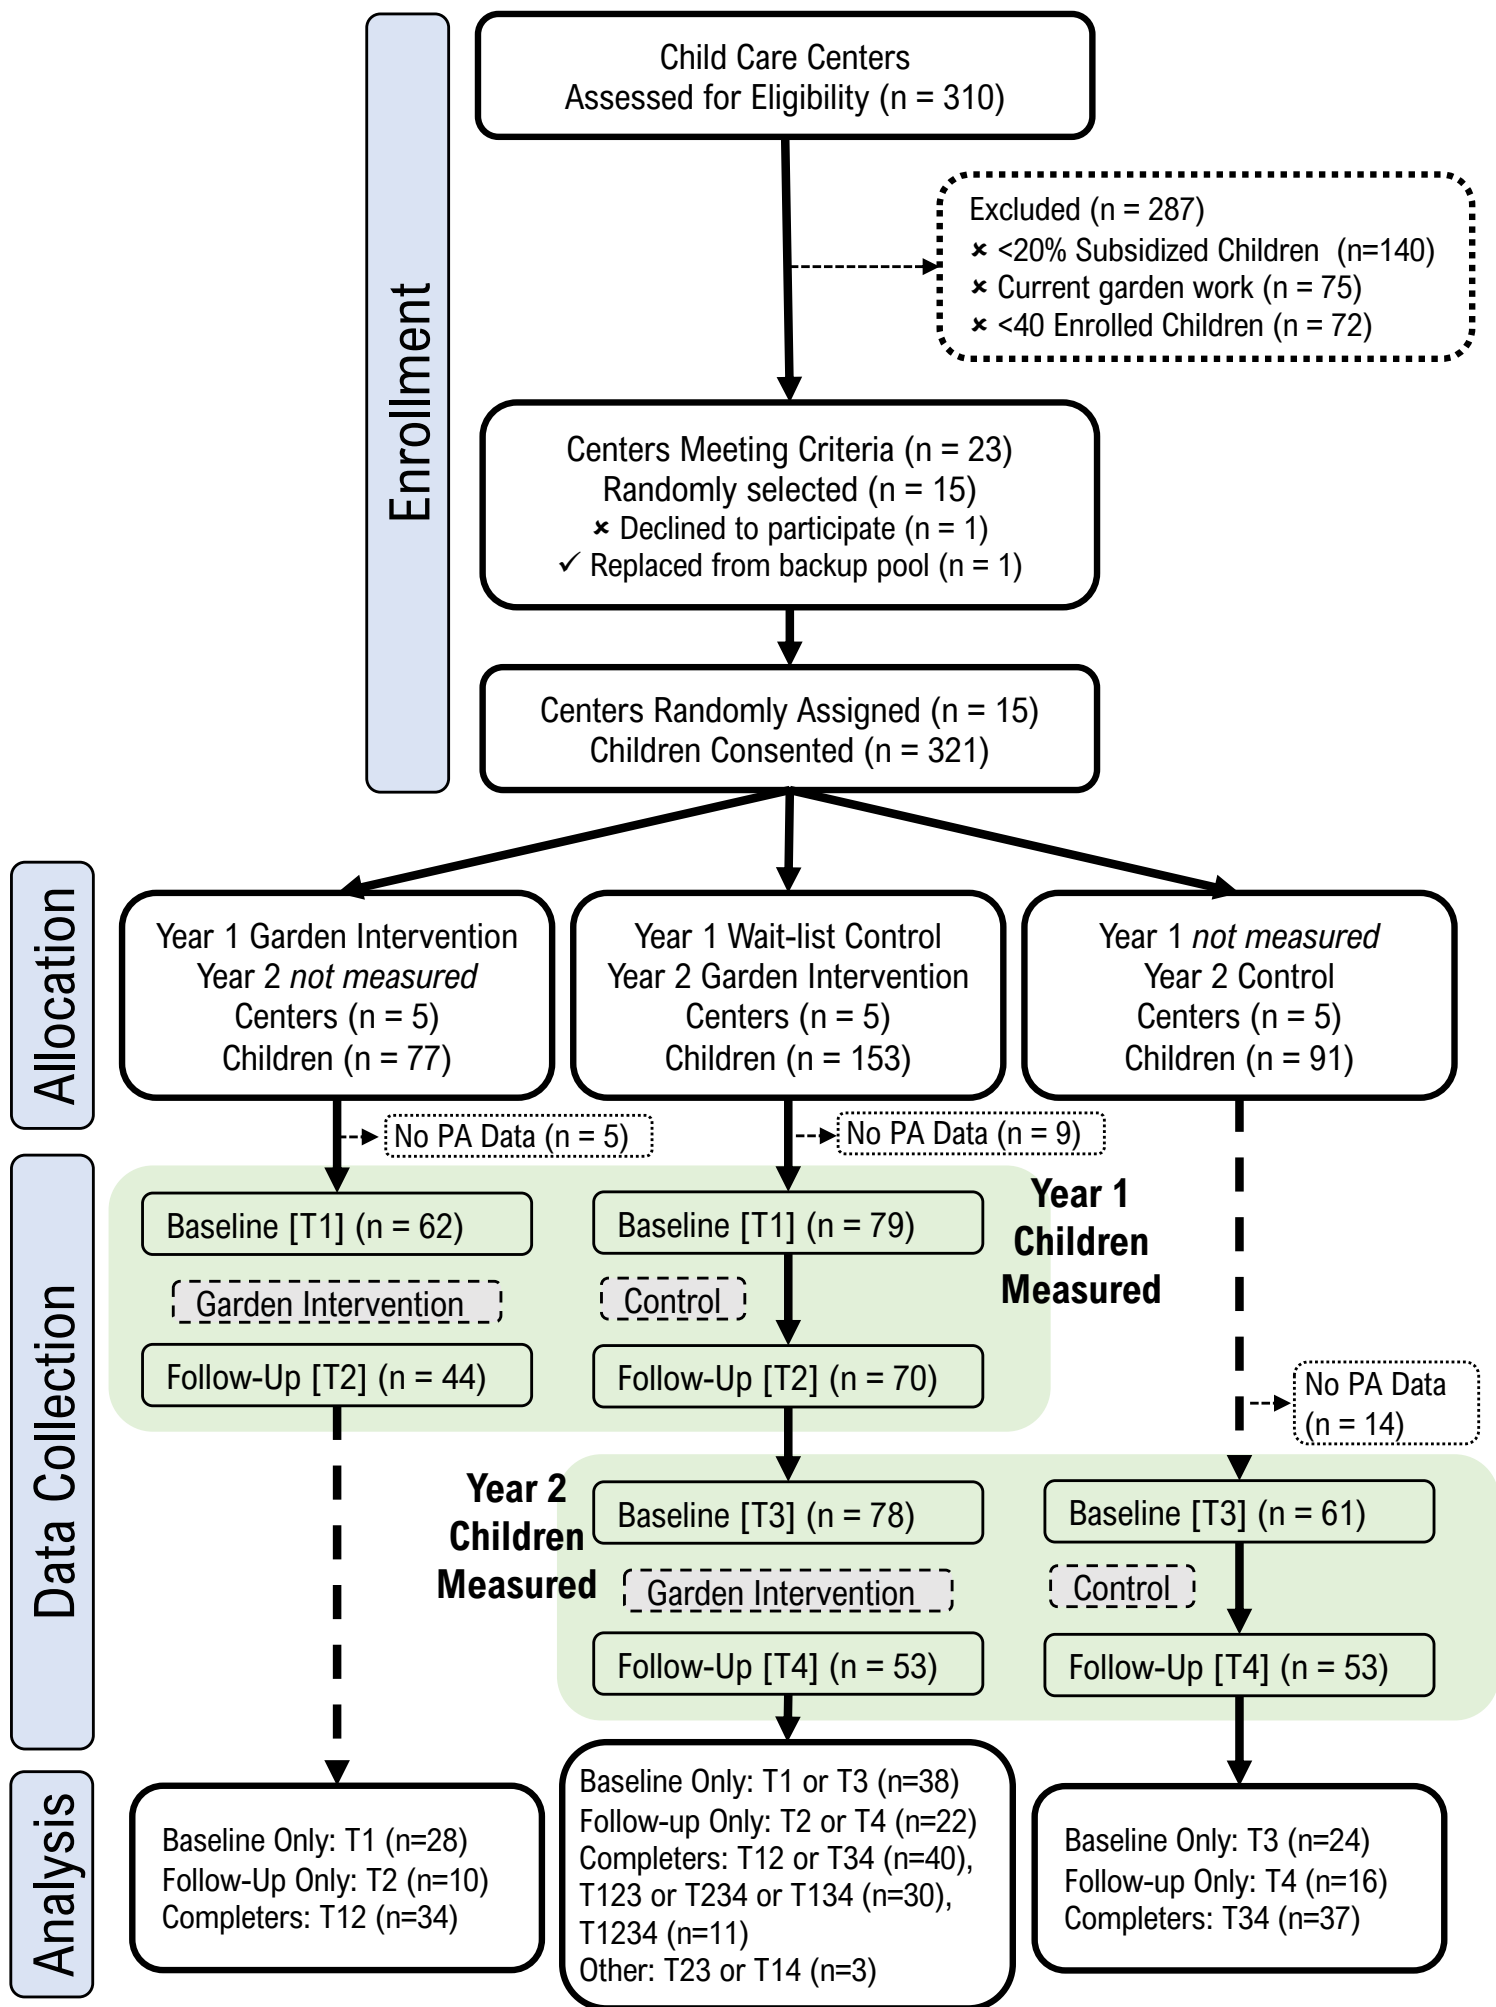

Table S1: Comparison of baseline information for children with baseline (BL) and follow-up (FU) physical activity data v. children with only BL physical activity outcomes

| Children with (BL and FU) Vs.<br>(BL Only) at Baseline  |          |                      |                   |                      |
|---------------------------------------------------------|----------|----------------------|-------------------|----------------------|
|                                                         |          | BL and FU<br>(n=190) | BL only<br>(n=90) |                      |
|                                                         |          | Percent              | Percent           | p-value <sup>a</sup> |
| Number of Days no<br>outside time during<br>measurement | 0 days   | 96.3                 | 96.7              | 0.883                |
|                                                         | 1 day    | 3.7                  | 3.3               |                      |
|                                                         | 2 days   | 0                    | 0                 |                      |
| Number of Days with<br>rain during<br>measurement       | 0 days   | 72.1                 | 75.6              | 0.155                |
|                                                         | 1 day    | 13.7                 | 17.8              |                      |
|                                                         | 2 days   | 14.2                 | 6.7               |                      |
| Child                                                   |          |                      |                   |                      |
| Race                                                    | White    | 36.3                 | 25.6              | < 0.001              |
|                                                         | Black    | 42.6                 | 37.8              |                      |
|                                                         | Hispanic | 5.8                  | 2.2               |                      |
|                                                         | Other    | 11.1                 | 5.6               |                      |
|                                                         | Missing  | 4.2                  | 28.9              |                      |
| Sex                                                     | Girl     | 55.3                 | 41.1              | 0.076                |
|                                                         | Boy      | 43.7                 | 56.7              |                      |
|                                                         | Missing  | 1.1                  | 2.2               |                      |
|                                                         |          | MN (SD)              | MN (SD)           | p-value <sup>b</sup> |
| Age                                                     | Years    | 3.89 (0.48)          | 3.87 (0.63)       | 0.714                |
| BMI percentile                                          | %-tile   | 57.85 (29.1)         | 60.21 (28.7)      | 0.594                |
| Physical Activity                                       |          |                      |                   |                      |
| Wear Days                                               | per week | 2.59 (0.65)          | 2.41 (0.72)       | 0.039                |
| Wear Hours                                              | per day  | 6.98 (0.78)          | 6.99 (0.83)       | 0.895                |
| Vector Magnitude                                        | Per min  | 1275 (324)           | 1231 (285)        | 0.268                |
| Moderate and                                            | min/day  | 34.6 (12.5)          | 35.0 (12.8)       | 0.813                |
| Vigorous                                                | % of Day | 8.21 (2.8)           | 8.25 (2.7)        | 0.906                |
| Sedentary                                               | min/day  | 270 (37)             | 278 (38)          | 0.108                |
|                                                         | % of Day | 64.8 (7.3)           | 66.5 (6.5)        | 0.060                |

NOTE: MN = Mean, SD = Standard Deviation, CON=control; INT= Intervention

<sup>a</sup> p-value for frequency comparison from Chi-square model

<sup>b</sup> p-value for mean comparison from General linear model

Table S2: Means and model summary for tests of GROUP x TIME x SEX interaction.

| UnAdjusted Means      |                 |      |     |    |        |       |    |        |       |      |       |       |        |      |        |      | Adjusted Means |  |  |  |  |         |  |  |  |  |    |  |  |  |  |          |  |  |  |  |
|-----------------------|-----------------|------|-----|----|--------|-------|----|--------|-------|------|-------|-------|--------|------|--------|------|----------------|--|--|--|--|---------|--|--|--|--|----|--|--|--|--|----------|--|--|--|--|
| Baseline              |                 |      |     |    |        |       |    |        |       |      |       |       |        |      |        |      | Follow-up      |  |  |  |  |         |  |  |  |  |    |  |  |  |  |          |  |  |  |  |
| Change                |                 |      |     |    |        |       |    |        |       |      |       |       |        |      |        |      | Interaction    |  |  |  |  |         |  |  |  |  |    |  |  |  |  |          |  |  |  |  |
| Baseline              |                 |      |     |    |        |       |    |        |       |      |       |       |        |      |        |      | Follow-up      |  |  |  |  |         |  |  |  |  |    |  |  |  |  |          |  |  |  |  |
| SEX                   |                 |      |     |    |        |       |    |        |       |      |       |       |        |      |        |      | Group          |  |  |  |  |         |  |  |  |  |    |  |  |  |  |          |  |  |  |  |
| N                     |                 |      |     |    |        |       |    |        |       |      |       |       |        |      |        |      | MEAN           |  |  |  |  | SD      |  |  |  |  |    |  |  |  |  |          |  |  |  |  |
| N                     |                 |      |     |    |        |       |    |        |       |      |       |       |        |      |        |      | MEAN           |  |  |  |  | SD      |  |  |  |  |    |  |  |  |  |          |  |  |  |  |
| % Change              |                 |      |     |    |        |       |    |        |       |      |       |       |        |      |        |      | Effect Size    |  |  |  |  | p-value |  |  |  |  |    |  |  |  |  |          |  |  |  |  |
| MEAN                  |                 |      |     |    |        |       |    |        |       |      |       |       |        |      |        |      | SE             |  |  |  |  | MEAN    |  |  |  |  | SE |  |  |  |  | % Change |  |  |  |  |
| Moderate and Vigorous | Minutes per day | BOY  | INT | 68 | 36.19  | 12.93 | 41 | 40.64  | 13.20 | 12.3 | 0.41  | 0.019 | 32.13  | 2.36 | 39.45  | 2.48 | 22.8           |  |  |  |  |         |  |  |  |  |    |  |  |  |  |          |  |  |  |  |
|                       |                 | BOY  | CON | 66 | 33.65  | 13.23 | 57 | 32.77  | 12.02 | -2.6 |       |       | 32.13  | 2.54 | 30.33  | 2.44 | -5.6           |  |  |  |  |         |  |  |  |  |    |  |  |  |  |          |  |  |  |  |
|                       |                 | GIRL | INT | 71 | 34.28  | 12.06 | 53 | 31.60  | 14.30 | -7.8 | -0.01 |       | 29.83  | 2.37 | 31.21  | 2.34 | 4.6            |  |  |  |  |         |  |  |  |  |    |  |  |  |  |          |  |  |  |  |
|                       |                 | GIRL | CON | 71 | 35.02  | 12.65 | 64 | 32.45  | 11.11 | -7.3 |       |       | 31.34  | 2.49 | 28.73  | 2.43 | -8.3           |  |  |  |  |         |  |  |  |  |    |  |  |  |  |          |  |  |  |  |
|                       | % of Day        | BOY  | INT | 68 | 8.55   | 2.91  | 41 | 9.85   | 2.96  | 15.2 | 0.60  | 0.021 | 7.34   | 0.57 | 9.11   | 0.60 | 24.2           |  |  |  |  |         |  |  |  |  |    |  |  |  |  |          |  |  |  |  |
|                       |                 | BOY  | CON | 66 | 8.14   | 2.87  | 57 | 7.71   | 2.77  | -5.3 |       |       | 7.21   | 0.60 | 6.94   | 0.59 | -3.8           |  |  |  |  |         |  |  |  |  |    |  |  |  |  |          |  |  |  |  |
|                       |                 | GIRL | INT | 71 | 8.03   | 2.76  | 53 | 7.47   | 3.18  | -7.0 | -0.04 |       | 6.81   | 0.57 | 7.17   | 0.57 | 5.3            |  |  |  |  |         |  |  |  |  |    |  |  |  |  |          |  |  |  |  |
|                       |                 | GIRL | CON | 71 | 8.21   | 2.68  | 64 | 7.77   | 2.57  | -5.4 |       |       | 7.06   | 0.60 | 6.51   | 0.58 | -7.8           |  |  |  |  |         |  |  |  |  |    |  |  |  |  |          |  |  |  |  |
| Sedentary Time        | Minutes per day | BOY  | INT | 68 | 274.87 | 42.57 | 41 | 255.83 | 31.40 | -6.9 | -0.95 | 0.155 | 286.46 | 5.68 | 270.14 | 6.01 | -5.7           |  |  |  |  |         |  |  |  |  |    |  |  |  |  |          |  |  |  |  |
|                       |                 | BOY  | CON | 66 | 268.77 | 31.28 | 57 | 284.73 | 38.18 | 5.9  |       |       | 287.29 | 6.16 | 290.39 | 5.90 | 1.1            |  |  |  |  |         |  |  |  |  |    |  |  |  |  |          |  |  |  |  |
|                       |                 | GIRL | INT | 71 | 274.33 | 36.92 | 53 | 276.51 | 38.19 | 0.8  | 0.02  |       | 285.45 | 5.72 | 280.56 | 5.63 | -1.7           |  |  |  |  |         |  |  |  |  |    |  |  |  |  |          |  |  |  |  |
|                       |                 | GIRL | CON | 71 | 271.42 | 38.15 | 64 | 272.79 | 41.07 | 0.5  |       |       | 284.68 | 6.03 | 288.90 | 5.87 | 1.5            |  |  |  |  |         |  |  |  |  |    |  |  |  |  |          |  |  |  |  |
|                       | % of Day        | BOY  | INT | 68 | 65.31  | 7.18  | 41 | 62.96  | 6.98  | -3.6 | -0.45 | 0.210 | 69.91  | 1.40 | 66.05  | 1.49 | -5.5           |  |  |  |  |         |  |  |  |  |    |  |  |  |  |          |  |  |  |  |
|                       |                 | BOY  | CON | 66 | 66.44  | 7.03  | 57 | 67.28  | 7.31  | 1.3  |       |       | 70.68  | 1.50 | 70.68  | 1.46 | 0.0            |  |  |  |  |         |  |  |  |  |    |  |  |  |  |          |  |  |  |  |
|                       |                 | GIRL | INT | 71 | 64.72  | 7.03  | 53 | 66.08  | 8.34  | 2.1  | 0.09  |       | 69.60  | 1.42 | 68.29  | 1.40 | -1.9           |  |  |  |  |         |  |  |  |  |    |  |  |  |  |          |  |  |  |  |
|                       |                 | GIRL | CON | 71 | 64.88  | 7.24  | 64 | 65.59  | 6.94  | 1.1  |       |       | 69.88  | 1.49 | 70.50  | 1.45 | 0.9            |  |  |  |  |         |  |  |  |  |    |  |  |  |  |          |  |  |  |  |

Means and model summary for tests of GROUP x TIME x AGE (baseline) interaction

|                       |                 | UnAdjusted Means |       |     |        |        |           |        |        |          |             |              | Adjusted Means |       |          |       |           |      |  |
|-----------------------|-----------------|------------------|-------|-----|--------|--------|-----------|--------|--------|----------|-------------|--------------|----------------|-------|----------|-------|-----------|------|--|
|                       |                 | Baseline         |       |     |        |        | Follow-up |        |        | Change   |             |              | Interaction    |       | Baseline |       | Follow-up |      |  |
|                       |                 | AGE              | Group | N   | MEAN   | SD     | N         | MEAN   | SD     | % Change | Effect Size | p-value      | MEAN           | SE    | MEAN     | SE    | % Change  |      |  |
| Moderate and Vigorous | Minutes per Day | Tert1            | INT   | 35  | 34.17  | 12.00  | 19        | 34.86  | 12.87  | 2.0      | 0.15        | Tert - 0.024 | 26.2           | 3.2   | 37.1     | 3.2   | 41.2      |      |  |
|                       |                 |                  | CON   | 56  | 35.77  | 11.62  | 49        | 34.71  | 10.76  | -3.0     |             | Cont - 0.100 | 27.7           | 3.1   | 26.8     | 2.9   | -3.4      |      |  |
|                       |                 | Tert2            | INT   | 42  | 36.15  | 12.27  | 39        | 36.30  | 14.65  | 0.4      | 0.15        |              | 28.8           | 2.6   | 33.1     | 2.5   | 14.7      |      |  |
|                       |                 |                  | CON   | 53  | 33.42  | 13.57  | 52        | 31.66  | 12.54  | -5.3     |             |              | 27.7           | 2.7   | 25.8     | 2.6   | -6.9      |      |  |
|                       |                 | Tert3            | INT   | 62  | 35.16  | 13.04  | 34        | 34.74  | 15.40  | -1.2     | 0.27        |              | 28.7           | 3.1   | 28.8     | 3.3   | 0.4       |      |  |
|                       |                 |                  | CON   | 30  | 33.43  | 13.72  | 20        | 29.39  | 9.71   | -12.1    |             |              | 31.4           | 3.2   | 26.6     | 3.5   | -15.5     |      |  |
|                       | % of Day        | Tert1            | INT   | 35  | 7.9    | 2.67   | 19        | 8.79   | 3.31   | 11.3     | 0.48        | Tert - 0.015 | 5.97           | 0.77  | 8.64     | 0.77  | 44.7      |      |  |
|                       |                 |                  | CON   | 56  | 8.37   | 2.49   | 49        | 8.03   | 2.43   | -4.1     |             | Cont - 0.082 | 6.06           | 0.74  | 6.00     | 0.70  | -1.0      |      |  |
|                       |                 | Tert2            | INT   | 42  | 8.53   | 2.96   | 39        | 8.66   | 3.26   | 1.5      | 0.14        |              | 6.49           | 0.62  | 7.53     | 0.62  | 15.9      |      |  |
|                       |                 |                  | CON   | 53  | 7.89   | 2.78   | 52        | 7.62   | 2.95   | -3.4     |             |              | 6.10           | 0.65  | 5.75     | 0.63  | -5.7      |      |  |
|                       |                 | Tert3            | INT   | 62  | 8.32   | 2.87   | 34        | 8.06   | 3.32   | -3.1     | 0.28        |              | 6.38           | 0.74  | 6.44     | 0.80  | 0.8       |      |  |
|                       |                 |                  | CON   | 30  | 8.33   | 3.17   | 20        | 7.23   | 2.34   | -13.2    |             |              | 7.09           | 0.78  | 5.95     | 0.85  | -16.0     |      |  |
|                       | Sedentary Time  | Minutes per Day  | Tert1 | INT | 35     | 286.21 | 46.79     | 19     | 253.26 | 33.48    | -11.5       | -1.02        | Tert - 0.005   | 300.6 | 7.8      | 273.2 | 7.8       | -9.1 |  |
|                       |                 |                  |       | CON | 56     | 273.28 | 35.82     | 49     | 282.36 | 41.38    | 3.3         |              | Cont - 0.023   | 297.8 | 7.6      | 298.8 | 7.1       | 0.3  |  |
|                       |                 |                  | Tert2 | INT | 42     | 275.53 | 35.16     | 39     | 266.6  | 35.63    | -3.2        | -0.41        |                | 291.3 | 6.3      | 277.5 | 6.2       | -4.7 |  |
|                       |                 |                  |       | CON | 53     | 271.63 | 33.41     | 52     | 276.79 | 41.2     | 1.9         |              |                | 293.7 | 6.6      | 299.0 | 6.3       | 1.8  |  |
| Tert3                 |                 |                  | INT   | 62  | 267.81 | 37.2   | 34        | 278.8  | 36.89  | 4.1      | -0.01       |              | 287.5          | 7.5   | 290.7    | 8.0   | 1.1       |      |  |
|                       |                 |                  | CON   | 30  | 261.34 | 35.14  | 20        | 272.65 | 34.02  | 4.3      |             |              | 286.4          | 7.9   | 290.2    | 8.6   | 1.3       |      |  |
| % of Day              |                 | Tert1            | INT   | 35  | 66.1   | 6.56   | 19        | 64.26  | 7.79   | -2.8     | -0.40       | Tert - 0.009 | 72.7           | 1.9   | 66.4     | 1.9   | -8.7      |      |  |
|                       |                 |                  | CON   | 56  | 64.84  | 6.67   | 49        | 65.62  | 7.67   | 1.2      |             | Cont - 0.033 | 73.3           | 1.9   | 72.9     | 1.8   | -0.5      |      |  |
|                       |                 | Tert2            | INT   | 42  | 65.17  | 5.9    | 39        | 64.4   | 7.78   | -1.2     | -0.28       |              | 71.2           | 1.6   | 67.8     | 1.5   | -4.7      |      |  |
|                       |                 |                  | CON   | 53  | 65.82  | 7.75   | 52        | 66.93  | 6.93   | 1.7      |             |              | 72.3           | 1.6   | 73.0     | 1.6   | 1.0       |      |  |
|                       |                 | Tert3            | INT   | 62  | 64.22  | 8.02   | 34        | 65.56  | 8.24   | 2.1      | 0.14        |              | 70.7           | 1.8   | 71.2     | 2.0   | 0.7       |      |  |
|                       |                 |                  | CON   | 30  | 66.53  | 6.91   | 20        | 66.81  | 6.44   | 0.4      |             |              | 70.1           | 1.9   | 70.7     | 2.1   | 0.8       |      |  |

AGE x GROUP x TIME interaction tested using age at baseline as continuous (Cont.) and tertile (tert) level variable.  
Age at Tert 1 (M = 3.3 SD = 0.21), Tert 2 (M = 3.8 SD = 0.13), Tert 3 (M = 4.5 SD = 0.34)

| Age of children in each tertile |    |      |      |        |      |      |
|---------------------------------|----|------|------|--------|------|------|
| Age Group                       | N  | Mean | STD  | Mediar | MIN  | MAX  |
| Tert1                           | 91 | 3.32 | 0.21 | 3.37   | 2.64 | 3.59 |
| Tert2                           | 95 | 3.83 | 0.13 | 3.84   | 3.60 | 4.05 |
| Tert3                           | 92 | 4.49 | 0.34 | 4.39   | 4.05 | 5.44 |
